# Supplementary material
Source: publisher figshare collection journal article supplement (https://acs.figshare.com/ndownloader/files/5882079)
Supplement: Supplementary file 1 [file 5882079]

# om020476m.cif

data_global

# 1. SUBMISSION DETAILS

_publ_contact_autor
;
        Manuscript OM020476M 
	Dr. B. de Bruin
        Department of Inorganic Chemistry
        Nijmegen SON Research Center
        University of Nijmegen
        Toernooiveld 1
        6525 ED  Nijmegen
        The Netherlands
;
_publ_contact_author_phone        '031 024 3652464'
_publ_contact_author_fax          '031 024 3553450'
_publ_contact_author_email        BdeBruin@sci.kun.nl
_publ_requested_journal           'Organometallics'
_publ_requested_coeditor_name     ?

_publ_contact_letter
;
;

#==============================================================================

# 3. AUTHOR LIST

loop_
 _publ_author_name
 _publ_author_address
     'Bruin, Bas de'
;    Department of Inorganic Chemistry
     Nijmegen SON Research Center
     University of Nijmegen
     Toernooiveld 1
     6525 ED  Nijmegen
     The Netherlands
;
     'Thewissen, Simone'
;    Department of Inorganic Chemistry
     Nijmegen SON Research Center
     University of Nijmegen
     Toernooiveld 1
     6525 ED  Nijmegen
     The Netherlands
;
     'Yuen, Tsi-Wai'
;    Department of Inorganic Chemistry
     Nijmegen SON Research Center
     University of Nijmegen
     Toernooiveld 1
     6525 ED  Nijmegen
     The Netherlands
;
     'Peters, Theo P.J.'
;    Department of Inorganic Chemistry
     Nijmegen SON Research Center
     University of Nijmegen
     Toernooiveld 1
     6525 ED  Nijmegen
     The Netherlands
;
     'Smits, Jan M. M.'
;    Department of Inorganic Chemistry
     Nijmegen SON Research Center
     University of Nijmegen
     Toernooiveld 1
     6525 ED  Nijmegen
     The Netherlands
;
     'Gal, Anton W.'
;    Department of Inorganic Chemistry
     Nijmegen SON Research Center
     University of Nijmegen
     Toernooiveld 1
     6525 ED  Nijmegen
     The Netherlands
;

#==============================================================================

# 4. TEXT

_publ_section_title
;
Formation of Ethylene bridged Dinuclear Ir^III^ species via Radical
Coupling of Ir^II^ and Ir^II^(ethene)
;
_publ_section_abstract
;
;
_publ_section_references
;
Beurskens, P. T., Beurskens, G., Bosman, W. P., Gelder, R. de,
Garc\'ia-Granda, S., Gould, R. O., Isra\"el, R. & Smits, J. M. M. (1996).
DIRDIF-96, A computer program system for crystal structure determination by
Patterson methods and direct methods applied to difference structure factors.
Crystallography Laboratory, University of Nijmegen, The Netherlands.

Beurskens, P. T., Beurskens, G., Strumpel, M. & Nordman, C. E. (1987).
In Patterson and Pattersons, pp. 356--367. Glusker, J. P., Patterson,
B. K. & Rossi, M., Eds. Oxford, England: Clarendon Press.

CAD4 EXPRESS Enraf-Nonius diffractometer control software (1994).
Release 5.1, Enraf-Nonius Delft, The Netherlands.

Grant, D. F. & Gabe, E. J. (1978).
J. Appl. Cryst. 11, 114--120.

International Tables for X-ray Crystallography (1974).
Vol. IV, Birmingham, England: Kynoch Press.

Lehman, M. S. & Larsen, F. K. (1974).
Acta Cryst. A30, 580--584.

North, A. C. T., Phillips, D. C. & Mathews, F. S. (1968).
Acta Cryst. A24, 351--359.

Sheldrick, G. M. (1997).
SHELXL-97, Program for the refinement of
crystal structures. University of G\"ottingen, Germany.

Smits, J. M. M., Behm, H., Bosman, W. P. & Beurskens, P. T. (1988).
J. Crystallogr. Spectrosc. Res. 18, 447--450.

Spek, A. L. (1990).
Acta Cryst. A46, C-34.

Spek, A. L. (1993).
PLUTON, A program for plotting molecular and crystal structures.
University of Utrecht, The Netherlands.

Spek, A. L. (1995).
PLATON-93, Program for display and analysis of crystal and molecularstructures. University of Utrecht, The Netherlands.
;
_publ_section_figure_captions
;
;
_publ_section_acknowledgements
;
;

data_TYKN1B

#==============================================================================


_audit_creation_method            'SHELXL, adapted and expanded'
_audit_creation_date              2002-03-14
_chemical_name_systematic
;
 ?
;
_chemical_name_common             ?
_chemical_formula_moiety          ?
_chemical_formula_sum
 'C25 H33 F12 Ir N5 O P2 S'
_chemical_formula_weight          933.76

loop_
 _atom_type_symbol
 _atom_type_description
 _atom_type_scat_dispersion_real
 _atom_type_scat_dispersion_imag
 _atom_type_scat_source
 'C'  'C'   0.0033   0.0016
 'International Tables Vol C Tables 4.2.6.8 and 6.1.1.4'
 'H'  'H'   0.0000   0.0000
 'International Tables Vol C Tables 4.2.6.8 and 6.1.1.4'
 'N'  'N'   0.0061   0.0033
 'International Tables Vol C Tables 4.2.6.8 and 6.1.1.4'
 'O'  'O'   0.0106   0.0060
 'International Tables Vol C Tables 4.2.6.8 and 6.1.1.4'
 'Ir'  'Ir'  -1.4442   7.9887
 'International Tables Vol C Tables 4.2.6.8 and 6.1.1.4'
 'P'  'P'   0.1023   0.0942
 'International Tables Vol C Tables 4.2.6.8 and 6.1.1.4'
 'F'  'F'   0.0171   0.0103
 'International Tables Vol C Tables 4.2.6.8 and 6.1.1.4'
 'S'  'S'   0.1246   0.1234
 'International Tables Vol C Tables 4.2.6.8 and 6.1.1.4'

_symmetry_cell_setting            triclinic
_symmetry_space_group_name_H-M    'P -1'

loop_
 _symmetry_equiv_pos_as_xyz
 'x, y, z'
 '-x, -y, -z'

_cell_length_a                    12.500(2)
_cell_length_b                    12.837(4)
_cell_length_c                    13.093(5)
_cell_angle_alpha                 61.49(3)
_cell_angle_beta                  75.105(19)
_cell_angle_gamma                 68.503(18)
_cell_volume                      1709.0(9)
_cell_formula_units_Z             2
_cell_measurement_temperature     293(2)
_cell_measurement_reflns_used     25
_cell_measurement_theta_min       10.349
_cell_measurement_theta_max       12.454

_exptl_crystal_description        'regular rod'
_exptl_crystal_colour             'transparent colorless'
_exptl_crystal_size_max           0.50
_exptl_crystal_size_mid           0.18
_exptl_crystal_size_min           0.11
#_exptl_crystal_density_meas      'not measured'
_exptl_crystal_density_diffrn     1.815
_exptl_crystal_density_method     'not measured'
_exptl_crystal_F_000              914
_exptl_absorpt_coefficient_mu     4.155
_exptl_absorpt_correction_type    experimental
#_exptl_absorpt_process_details   '(North, Phillips & Mathews, 1968)'
_exptl_absorpt_correction_T_min   0.909
_exptl_absorpt_correction_T_max   1.141

_exptl_special_details
;
 ?
;

_diffrn_ambient_temperature       293(2)
_diffrn_radiation_wavelength      0.71073
_diffrn_radiation_type            MoK\a
_diffrn_radiation_source          'fine-focus sealed tube'
_diffrn_radiation_monochromator   graphite
_diffrn_measurement_device        'Nonius CAD4'
_diffrn_measurement_method        \w/2\q-scan
_diffrn_special_details
;
\w/2\q-scan with variable scan width, variable scan speed and variable aperture.
Scan width (0.69 + 0.47tan\q)\%, range: 1.08\%-1.41\%,
aperture (2.10 + 0.39tan\q)mm., range: 2.12-2.31mm.
Maximum scan time: 30 sec/reflection.
;
_diffrn_detector_area_resol_mean  ?
_diffrn_standards_number          3
_diffrn_standards_interval_time   7200
_diffrn_standards_decay_%         8.934
_diffrn_reflns_number             8189
_diffrn_reflns_av_R_equivalents   0.0149
_diffrn_reflns_av_sigmaI/netI     0.0315
_diffrn_reflns_limit_h_min        -16
_diffrn_reflns_limit_h_max        0
_diffrn_reflns_limit_k_min        -16
_diffrn_reflns_limit_k_max        15
_diffrn_reflns_limit_l_min        -16
_diffrn_reflns_limit_l_max        16
_diffrn_reflns_theta_min          2.93
_diffrn_reflns_theta_max          27.47
_reflns_number_total              7831
_reflns_number_gt                 6621
_reflns_number_observed           6621
_reflns_threshold_expression      >2sigma(I)
_reflns_observed_criterion        >2sigma(I)

_computing_data_collection
;
CAD4 EXPRESS (Enraf-Nonius, 1994)
;
#_computing_cell_refinement
#;
#CAD4 EXPRESS (Enraf-Nonius, 1994)
#;
_computing_data_reduction
;
local programs (Smits et al., 1988),
profile analysis (Lehman & Larsen, 1974, Grant & Gabe, 1978),
EMPABS (North et al., 1968)
;
_computing_structure_solution
;
DIRDIF (Beurskens et al., 1996),
PATTY (Beurskens et al., 1987)
;
_computing_structure_refinement   'SHELXL-97 (Sheldrick, 1997)'
_computing_molecular_graphics
;
PLUTON (Spek, 1993),
PLATON (Spek, 1990, 1995)
;
_computing_publication_material   ?

_refine_special_details
;
 Refinement of F^2^ against ALL reflections.  The weighted R-factor wR and
 goodness of fit S are based on F^2^, conventional R-factors R are based
 on F, with F set to zero for negative F^2^. The threshold expression of
 F^2^ > 2sigma(F^2^) is used only for calculating R-factors(gt) etc. and is
 not relevant to the choice of reflections for refinement.  R-factors based
 on F^2^ are statistically about twice as large as those based on F, and R-
 factors based on ALL data will be even larger.
;

_refine_ls_structure_factor_coef  Fsqd
_refine_ls_matrix_type            full
_refine_ls_weighting_scheme       calc
_refine_ls_weighting_details      
;
w=1/[\s^2^(Fo^2^)+(0.0678P)^2^+0.9425P] where P=(Fo^2^+2Fc^2^)/3
;
_atom_sites_solution_primary      direct
_atom_sites_solution_secondary    difmap
_atom_sites_solution_hydrogens    geom
_refine_ls_hydrogen_treatment     mixed
_refine_ls_extinction_method      none
_refine_ls_extinction_coef        ?
_refine_ls_number_reflns          7831
_refine_ls_number_parameters      430
_refine_ls_number_restraints      0
_refine_ls_R_factor_all           0.0538
_refine_ls_R_factor_gt            0.0408
_refine_ls_R_factor_obs           0.0408
_refine_ls_wR_factor_ref          0.1101
_refine_ls_wR_factor_all          0.1101
_refine_ls_wR_factor_gt           0.1032
_refine_ls_wR_factor_obs          0.1032
_refine_ls_goodness_of_fit_ref    1.093
_refine_ls_goodness_of_fit_all    1.093
_refine_ls_restrained_S_all       1.093
_refine_ls_shift/su_max           0.001
_refine_ls_shift/esd_max          0.001
_refine_ls_shift/su_mean          0.000
_refine_ls_shift/esd_mean         0.000

loop_
 _atom_site_label
 _atom_site_type_symbol
 _atom_site_fract_x
 _atom_site_fract_y
 _atom_site_fract_z
 _atom_site_U_iso_or_equiv
 _atom_site_adp_type
 _atom_site_occupancy
 _atom_site_calc_flag
 _atom_site_refinement_flags
 _atom_site_disorder_assembly
 _atom_site_disorder_group
Ir1 Ir 0.137289(17) 0.060681(18) 0.312961(16) 0.03887(8) Uani 1 d . . .
N1 N 0.1052(5) 0.2449(5) 0.2649(4) 0.0527(12) Uani 1 d . . .
N2 N 0.1300(5) -0.1098(5) 0.3409(4) 0.0511(11) Uani 1 d . . .
N3 N 0.2587(4) 0.0926(5) 0.1471(4) 0.0474(10) Uani 1 d . . .
N4 N 0.0224(4) 0.1178(5) 0.1984(4) 0.0470(10) Uani 1 d . . .
N5 N 0.2439(4) 0.0034(5) 0.4340(4) 0.0487(11) Uani 1 d . . .
C1 C 0.0078(5) 0.0614(5) 0.4534(5) 0.0468(12) Uani 1 d . . .
H1A H 0.0241 0.1024 0.4911 0.056 Uiso 1 calc R . .
H1B H -0.0654 0.1119 0.4208 0.056 Uiso 1 calc R . .
C2 C 0.2952(5) -0.0282(6) 0.5088(5) 0.0520(13) Uani 1 d . . .
C3 C 0.3620(7) -0.0738(7) 0.6045(6) 0.0700(19) Uani 1 d . . .
H3A H 0.3490 -0.1503 0.6643 0.105 Uiso 1 calc R . .
H3B H 0.3388 -0.0141 0.6361 0.105 Uiso 1 calc R . .
H3C H 0.4426 -0.0873 0.5768 0.105 Uiso 1 calc R . .
C11 C -0.0456(6) 0.2500(6) 0.1750(6) 0.0628(17) Uani 1 d . . .
H11A H -0.0621 0.2949 0.0940 0.075 Uiso 1 calc R . .
H11B H -0.1188 0.2508 0.2235 0.075 Uiso 1 calc R . .
C12 C 0.0152(7) 0.3147(6) 0.1983(6) 0.0627(17) Uani 1 d . . .
C13 C -0.0185(10) 0.4439(8) 0.1583(8) 0.100(3) Uani 1 d . . .
H13 H -0.0797 0.4938 0.1126 0.120 Uiso 1 calc R . .
C14 C 0.0428(12) 0.4960(8) 0.1890(9) 0.110(4) Uani 1 d . . .
H14 H 0.0220 0.5815 0.1622 0.132 Uiso 1 calc R . .
C15 C 0.1309(11) 0.4249(8) 0.2562(9) 0.101(3) Uani 1 d . . .
H15 H 0.1701 0.4598 0.2771 0.121 Uiso 1 calc R . .
C16 C 0.1611(7) 0.2983(7) 0.2931(7) 0.0714(19) Uani 1 d . . .
H16 H 0.2221 0.2482 0.3391 0.086 Uiso 1 calc R . .
C21 C -0.0492(6) 0.0307(7) 0.2543(6) 0.0639(17) Uani 1 d . . .
H21A H -0.0898 0.0376 0.1964 0.077 Uiso 1 calc R . .
H21B H -0.1059 0.0501 0.3136 0.077 Uiso 1 calc R . .
C22 C 0.0289(7) -0.0973(7) 0.3082(5) 0.0612(17) Uani 1 d . . .
C23 C -0.0067(10) -0.1959(10) 0.3281(8) 0.092(3) Uani 1 d . . .
H23 H -0.0756 -0.1841 0.3039 0.110 Uiso 1 calc R . .
C24 C 0.0663(14) -0.3147(10) 0.3867(10) 0.111(4) Uani 1 d . . .
H24 H 0.0437 -0.3843 0.4075 0.133 Uiso 1 calc R . .
C25 C 0.1671(10) -0.3271(7) 0.4119(8) 0.089(3) Uani 1 d . . .
H25 H 0.2170 -0.4060 0.4463 0.107 Uiso 1 calc R . .
C26 C 0.2014(7) -0.2231(6) 0.3881(6) 0.0676(19) Uani 1 d . . .
C27 C 0.3181(8) -0.2409(8) 0.4098(8) 0.090(3) Uani 1 d . . .
H27A H 0.3529 -0.1837 0.3427 0.136 Uiso 1 calc R . .
H27B H 0.3645 -0.3240 0.4242 0.136 Uiso 1 calc R . .
H27C H 0.3131 -0.2264 0.4766 0.136 Uiso 1 calc R . .
C31 C 0.0846(5) 0.1051(6) 0.0879(5) 0.0525(14) Uani 1 d . . .
H31A H 0.0950 0.0222 0.0979 0.063 Uiso 1 calc R . .
H31B H 0.0372 0.1630 0.0241 0.063 Uiso 1 calc R . .
C32 C 0.2009(5) 0.1288(5) 0.0564(5) 0.0485(12) Uani 1 d . . .
C33 C 0.2469(7) 0.1719(7) -0.0581(5) 0.0640(17) Uani 1 d . . .
H33 H 0.2039 0.1955 -0.1179 0.077 Uiso 1 calc R . .
C34 C 0.3582(8) 0.1792(9) -0.0819(6) 0.079(2) Uani 1 d . . .
H34 H 0.3922 0.2084 -0.1585 0.095 Uiso 1 calc R . .
C35 C 0.4187(7) 0.1421(9) 0.0104(7) 0.080(2) Uani 1 d . . .
H35 H 0.4947 0.1446 -0.0041 0.097 Uiso 1 calc R . .
C36 C 0.3674(6) 0.1016(6) 0.1230(6) 0.0590(15) Uani 1 d . . .
C37 C 0.4325(7) 0.0683(10) 0.2212(8) 0.090(3) Uani 1 d . . .
H37A H 0.3927 0.1226 0.2588 0.135 Uiso 1 calc R . .
H37B H 0.5089 0.0767 0.1908 0.135 Uiso 1 calc R . .
H37C H 0.4375 -0.0157 0.2769 0.135 Uiso 1 calc R . .
P1 P 0.74582(16) 0.2199(2) 0.96585(18) 0.0658(5) Uani 1 d . . .
F1 F 0.7491(12) 0.0944(8) 1.0715(8) 0.203(5) Uani 1 d . . .
F2 F 0.6130(5) 0.2741(7) 0.9964(6) 0.127(2) Uani 1 d . . .
F3 F 0.7376(8) 0.3465(7) 0.8593(8) 0.179(4) Uani 1 d . . .
F4 F 0.8748(5) 0.1671(10) 0.9356(9) 0.180(4) Uani 1 d . . .
F5 F 0.7173(6) 0.1714(7) 0.8897(6) 0.123(2) Uani 1 d . . .
F6 F 0.7764(6) 0.2654(8) 1.0431(8) 0.163(4) Uani 1 d . . .
P2 P 0.3154(2) 0.28286(19) 0.5604(2) 0.0721(5) Uani 1 d . . .
F7 F 0.3312(10) 0.3897(8) 0.4450(9) 0.226(6) Uani 1 d . . .
F8 F 0.4351(8) 0.2086(11) 0.5570(15) 0.301(10) Uani 1 d . . .
F9 F 0.2990(9) 0.1734(7) 0.6806(6) 0.166(3) Uani 1 d . . .
F10 F 0.1985(7) 0.3531(9) 0.5638(17) 0.316(11) Uani 1 d . . .
F11 F 0.3409(19) 0.3520(13) 0.6066(14) 0.321(10) Uani 1 d . . .
F12 F 0.2868(17) 0.2138(9) 0.5128(11) 0.304(10) Uani 1 d . . .
S1 S 0.3722(3) 0.5597(3) 0.7889(3) 0.1280(13) Uani 1 d . . .
O41 O 0.2965(5) 0.6762(6) 0.7064(6) 0.0992(19) Uani 1 d . . .
C42 C 0.4599(11) 0.4690(11) 0.7122(11) 0.120(4) Uani 1 d . . .
H42A H 0.4126 0.4359 0.6951 0.181 Uiso 1 calc R . .
H42B H 0.5184 0.4023 0.7596 0.181 Uiso 1 calc R . .
H42C H 0.4957 0.5199 0.6405 0.181 Uiso 1 calc R . .
C43 C 0.4744(16) 0.5846(15) 0.8225(15) 0.198(10) Uani 1 d . . .
H43A H 0.4884 0.5295 0.9024 0.297 Uiso 1 calc R . .
H43B H 0.4513 0.6687 0.8125 0.297 Uiso 1 calc R . .
H43C H 0.5438 0.5704 0.7725 0.297 Uiso 1 calc R . .

loop_
 _atom_site_aniso_label
 _atom_site_aniso_U_11
 _atom_site_aniso_U_22
 _atom_site_aniso_U_33
 _atom_site_aniso_U_23
 _atom_site_aniso_U_13
 _atom_site_aniso_U_12
Ir1 0.04137(12) 0.03957(12) 0.03449(11) -0.01651(8) -0.00664(7) -0.00745(8)
N1 0.067(3) 0.047(3) 0.044(3) -0.020(2) -0.004(2) -0.016(2)
N2 0.063(3) 0.049(3) 0.041(2) -0.024(2) 0.004(2) -0.015(2)
N3 0.048(3) 0.053(3) 0.041(2) -0.020(2) -0.0015(19) -0.017(2)
N4 0.042(2) 0.061(3) 0.040(2) -0.024(2) -0.0052(19) -0.012(2)
N5 0.049(3) 0.051(3) 0.044(2) -0.020(2) -0.008(2) -0.011(2)
C1 0.051(3) 0.049(3) 0.037(3) -0.019(2) -0.004(2) -0.009(2)
C2 0.052(3) 0.051(3) 0.055(3) -0.024(3) -0.016(3) -0.008(3)
C3 0.080(5) 0.063(4) 0.066(4) -0.021(3) -0.035(4) -0.009(4)
C11 0.052(3) 0.066(4) 0.054(3) -0.023(3) -0.019(3) 0.005(3)
C12 0.080(5) 0.050(3) 0.047(3) -0.016(3) -0.009(3) -0.010(3)
C13 0.142(9) 0.057(5) 0.073(5) -0.019(4) -0.033(6) 0.003(5)
C14 0.183(12) 0.047(4) 0.097(7) -0.017(4) -0.054(8) -0.022(6)
C15 0.169(11) 0.056(5) 0.092(6) -0.020(4) -0.046(7) -0.041(6)
C16 0.082(5) 0.060(4) 0.081(5) -0.033(4) -0.017(4) -0.021(4)
C21 0.070(4) 0.092(5) 0.049(3) -0.034(3) -0.001(3) -0.042(4)
C22 0.082(5) 0.075(4) 0.047(3) -0.035(3) 0.017(3) -0.048(4)
C23 0.127(8) 0.100(7) 0.078(5) -0.048(5) 0.017(5) -0.070(7)
C24 0.180(13) 0.085(7) 0.092(7) -0.046(6) 0.019(8) -0.075(8)
C25 0.123(8) 0.049(4) 0.079(6) -0.028(4) 0.015(5) -0.023(5)
C26 0.079(5) 0.049(4) 0.059(4) -0.026(3) 0.007(3) -0.007(3)
C27 0.100(7) 0.069(5) 0.092(6) -0.042(5) -0.036(5) 0.015(5)
C31 0.055(3) 0.067(4) 0.040(3) -0.028(3) -0.003(2) -0.016(3)
C32 0.054(3) 0.050(3) 0.042(3) -0.019(2) -0.004(2) -0.015(3)
C33 0.081(5) 0.075(4) 0.042(3) -0.024(3) 0.000(3) -0.034(4)
C34 0.089(6) 0.107(6) 0.048(4) -0.034(4) 0.021(4) -0.052(5)
C35 0.066(5) 0.107(6) 0.074(5) -0.038(5) 0.016(4) -0.046(5)
C36 0.052(4) 0.062(4) 0.058(4) -0.021(3) -0.006(3) -0.017(3)
C37 0.057(4) 0.130(8) 0.077(5) -0.028(5) -0.014(4) -0.038(5)
P1 0.0576(10) 0.0808(12) 0.0725(11) -0.0456(10) -0.0122(8) -0.0124(9)
F1 0.330(14) 0.128(6) 0.125(6) 0.000(5) -0.090(8) -0.067(8)
F2 0.070(3) 0.183(7) 0.176(6) -0.132(6) 0.000(4) -0.020(4)
F3 0.181(8) 0.114(6) 0.195(8) -0.023(5) -0.004(7) -0.061(6)
F4 0.057(3) 0.295(11) 0.267(10) -0.216(10) -0.025(5) 0.005(5)
F5 0.126(5) 0.152(6) 0.137(5) -0.101(5) -0.037(4) -0.019(4)
F6 0.108(5) 0.253(9) 0.238(9) -0.202(8) -0.041(5) -0.017(5)
P2 0.0776(13) 0.0620(11) 0.0728(12) -0.0255(10) -0.0168(10) -0.0140(10)
F7 0.225(10) 0.116(6) 0.190(9) 0.016(6) 0.036(8) -0.045(7)
F8 0.099(6) 0.171(10) 0.42(2) -0.011(12) 0.013(9) 0.006(6)
F9 0.254(10) 0.120(6) 0.090(4) -0.008(4) -0.016(5) -0.068(6)
F10 0.090(6) 0.124(7) 0.62(3) -0.118(12) 0.045(11) -0.020(5)
F11 0.59(3) 0.210(12) 0.289(15) -0.092(11) -0.218(19) -0.150(17)
F12 0.59(3) 0.134(7) 0.259(13) -0.078(8) -0.273(16) -0.033(11)
S1 0.126(3) 0.110(2) 0.098(2) -0.0436(18) 0.0053(18) 0.0075(19)
O41 0.079(4) 0.102(5) 0.108(5) -0.056(4) -0.013(3) 0.002(3)
C42 0.128(9) 0.108(8) 0.148(10) -0.085(8) -0.003(8) -0.024(7)
C43 0.215(17) 0.169(14) 0.218(17) -0.128(14) -0.161(15) 0.093(13)

_geom_special_details
;
 All esds (except the esd in the dihedral angle between two l.s. planes)
 are estimated using the full covariance matrix.  The cell esds are taken
 into account individually in the estimation of esds in distances, angles
 and torsion angles; correlations between esds in cell parameters are only
 used when they are defined by crystal symmetry.  An approximate (isotropic)
 treatment of cell esds is used for estimating esds involving l.s. planes.
;

loop_
 _geom_bond_atom_site_label_1
 _geom_bond_atom_site_label_2
 _geom_bond_distance
 _geom_bond_site_symmetry_2
 _geom_bond_publ_flag
Ir1 N5 2.020(5) . Y
Ir1 N4 2.034(5) . Y
Ir1 N1 2.041(5) . Y
Ir1 N2 2.073(5) . Y
Ir1 C1 2.116(5) . Y
Ir1 N3 2.258(5) . Y
N1 C16 1.349(9) . Y
N1 C12 1.360(9) . Y
N2 C26 1.330(9) . Y
N2 C22 1.368(9) . Y
N3 C36 1.348(8) . Y
N3 C32 1.349(7) . Y
N4 C21 1.484(8) . Y
N4 C11 1.509(8) . Y
N4 C31 1.509(7) . Y
N5 C2 1.135(7) . Y
C1 C1 1.510(11) 2_556 Y
C2 C3 1.446(8) . Y
C11 C12 1.477(10) . Y
C12 C13 1.405(11) . Y
C13 C14 1.410(15) . Y
C14 C15 1.347(15) . Y
C15 C16 1.382(11) . Y
C21 C22 1.491(11) . Y
C22 C23 1.379(10) . Y
C23 C24 1.404(16) . Y
C24 C25 1.319(16) . Y
C25 C26 1.420(12) . Y
C26 C27 1.473(12) . Y
C31 C32 1.507(8) . Y
C32 C33 1.371(8) . Y
C33 C34 1.373(11) . Y
C34 C35 1.384(12) . Y
C35 C36 1.372(10) . Y
C36 C37 1.503(10) . Y
P1 F4 1.531(6) . Y
P1 F1 1.537(8) . Y
P1 F3 1.544(8) . Y
P1 F6 1.561(6) . Y
P1 F5 1.563(5) . Y
P1 F2 1.575(6) . Y
P2 F10 1.411(9) . Y
P2 F11 1.440(9) . Y
P2 F8 1.452(9) . Y
P2 F12 1.475(8) . Y
P2 F7 1.507(8) . Y
P2 F9 1.558(7) . Y
S1 O41 1.497(7) . Y
S1 C43 1.629(17) . Y
S1 C42 1.784(10) . Y

loop_
 _geom_angle_atom_site_label_1
 _geom_angle_atom_site_label_2
 _geom_angle_atom_site_label_3
 _geom_angle
 _geom_angle_site_symmetry_1
 _geom_angle_site_symmetry_3
 _geom_angle_publ_flag
N5 Ir1 N4 176.76(17) . . Y
N5 Ir1 N1 95.2(2) . . Y
N4 Ir1 N1 84.8(2) . . Y
N5 Ir1 N2 99.3(2) . . Y
N4 Ir1 N2 80.4(2) . . Y
N1 Ir1 N2 164.7(2) . . Y
N5 Ir1 C1 83.0(2) . . Y
N4 Ir1 C1 93.8(2) . . Y
N1 Ir1 C1 86.6(2) . . Y
N2 Ir1 C1 90.2(2) . . Y
N5 Ir1 N3 102.42(19) . . Y
N4 Ir1 N3 80.82(18) . . Y
N1 Ir1 N3 85.18(19) . . Y
N2 Ir1 N3 96.46(18) . . Y
C1 Ir1 N3 170.55(18) . . Y
C16 N1 C12 120.8(6) . . Y
C16 N1 Ir1 127.4(5) . . Y
C12 N1 Ir1 111.8(4) . . Y
C26 N2 C22 118.0(6) . . Y
C26 N2 Ir1 131.6(5) . . Y
C22 N2 Ir1 110.3(4) . . Y
C36 N3 C32 117.6(5) . . Y
C36 N3 Ir1 131.1(4) . . Y
C32 N3 Ir1 110.1(4) . . Y
C21 N4 C11 113.8(5) . . Y
C21 N4 C31 106.7(5) . . Y
C11 N4 C31 112.0(5) . . Y
C21 N4 Ir1 106.3(4) . . Y
C11 N4 Ir1 107.4(4) . . Y
C31 N4 Ir1 110.5(3) . . Y
C2 N5 Ir1 173.9(5) . . Y
C1 C1 Ir1 118.0(5) 2_556 . Y
N5 C2 C3 177.6(7) . . Y
C12 C11 N4 113.4(5) . . Y
N1 C12 C13 119.0(8) . . Y
N1 C12 C11 118.0(6) . . Y
C13 C12 C11 123.0(7) . . Y
C12 C13 C14 118.4(9) . . Y
C15 C14 C13 121.5(8) . . Y
C14 C15 C16 118.0(9) . . Y
N1 C16 C15 122.3(8) . . Y
N4 C21 C22 108.2(5) . . Y
N2 C22 C23 123.8(8) . . Y
N2 C22 C21 117.0(5) . . Y
C23 C22 C21 119.1(8) . . Y
C22 C23 C24 116.7(10) . . Y
C25 C24 C23 119.6(9) . . Y
C24 C25 C26 121.8(9) . . Y
N2 C26 C25 119.8(8) . . Y
N2 C26 C27 120.4(7) . . Y
C25 C26 C27 119.8(8) . . Y
C32 C31 N4 112.7(5) . . Y
N3 C32 C33 123.9(6) . . Y
N3 C32 C31 115.7(5) . . Y
C33 C32 C31 120.0(6) . . Y
C32 C33 C34 118.2(7) . . Y
C33 C34 C35 118.6(6) . . Y
C36 C35 C34 120.5(7) . . Y
N3 C36 C35 121.1(6) . . Y
N3 C36 C37 119.2(6) . . Y
C35 C36 C37 119.6(7) . . Y
F4 P1 F1 88.2(7) . . Y
F4 P1 F3 93.7(6) . . Y
F1 P1 F3 177.7(6) . . Y
F4 P1 F6 89.6(4) . . Y
F1 P1 F6 89.7(5) . . Y
F3 P1 F6 91.5(5) . . Y
F4 P1 F5 89.4(4) . . Y
F1 P1 F5 89.4(5) . . Y
F3 P1 F5 89.5(5) . . Y
F6 P1 F5 178.7(4) . . Y
F4 P1 F2 179.7(4) . . Y
F1 P1 F2 91.9(6) . . Y
F3 P1 F2 86.2(5) . . Y
F6 P1 F2 90.6(3) . . Y
F5 P1 F2 90.3(3) . . Y
F10 P2 F11 88.7(10) . . Y
F10 P2 F8 178.8(8) . . Y
F11 P2 F8 92.4(11) . . Y
F10 P2 F12 90.1(10) . . Y
F11 P2 F12 178.8(11) . . Y
F8 P2 F12 88.8(9) . . Y
F10 P2 F7 85.7(7) . . Y
F11 P2 F7 83.3(8) . . Y
F8 P2 F7 94.9(7) . . Y
F12 P2 F7 96.4(8) . . Y
F10 P2 F9 94.1(7) . . Y
F11 P2 F9 96.0(7) . . Y
F8 P2 F9 85.3(6) . . Y
F12 P2 F9 84.3(6) . . Y
F7 P2 F9 179.2(6) . . Y
O41 S1 C43 112.4(7) . . Y
O41 S1 C42 108.9(5) . . Y
C43 S1 C42 98.6(7) . . Y

_diffrn_reflns_theta_full              27.47
_refine_diff_density_max    1.159
_refine_diff_density_min   -0.914
_refine_diff_density_rms    0.132
_publ_section_experimental
;
Crystal colour: transparent colorless, crystal shape: regular rod.
Profile analysis combining the methods of Lehman & Larsen (1974) 
and Grant & Gabe (1978).
Empirical absorption correction using EMPABS 
(North, Phillips & Mathews, 1968).

Data collection parameters:
\w/2\q-scan with variable scan width, variable scan speed and variable aperture.
Scan width (0.69 + 0.47tan\q)\%, range: 1.08\%-1.41\%,                          
aperture (2.10 + 0.39tan\q)mm., range: 2.12-2.31mm.                             
Maximum scan time: 30 sec/reflection.                                           

Least-squares refinement using calculated weights:

w=1/[\s^2^(Fo^2^)+(0.0678P)^2^+0.9425P] where P=(Fo^2^+2Fc^2^)/3                

>From the anisotropic thermal displacement parameters for the PF~6~ and
DMSO moieties it is clear that some atoms show a large positional
disorder. Although it is possible to use several partially occupied
positions for these atoms, no physically reasonable models result from
these parameters, at least not any better than the models presented here.
The assignment of atomic species in the DMSO moiety is based on bond
distances and equivalent isotropic thermal displacement parameters.
;

data_TYUEN2

#==============================================================================


_audit_creation_method            'SHELXL, adapted and expanded'
_audit_creation_date              2002-05-28
_chemical_name_systematic
;
 ?
;
_chemical_name_common             ?
_chemical_formula_moiety          ?
_chemical_formula_sum
 'C50 H61 F24 Ir2 N11 P4'
_chemical_formula_weight          1780.38

loop_
 _atom_type_symbol
 _atom_type_description
 _atom_type_scat_dispersion_real
 _atom_type_scat_dispersion_imag
 _atom_type_scat_source
 'C'  'C'   0.0033   0.0016
 'International Tables Vol C Tables 4.2.6.8 and 6.1.1.4'
 'H'  'H'   0.0000   0.0000
 'International Tables Vol C Tables 4.2.6.8 and 6.1.1.4'
 'N'  'N'   0.0061   0.0033
 'International Tables Vol C Tables 4.2.6.8 and 6.1.1.4'
 'Ir'  'Ir'  -1.4442   7.9887
 'International Tables Vol C Tables 4.2.6.8 and 6.1.1.4'
 'P'  'P'   0.1023   0.0942
 'International Tables Vol C Tables 4.2.6.8 and 6.1.1.4'
 'F'  'F'   0.0171   0.0103
 'International Tables Vol C Tables 4.2.6.8 and 6.1.1.4'

_symmetry_cell_setting            triclinic
_symmetry_space_group_name_H-M    'P -1'

loop_
 _symmetry_equiv_pos_as_xyz
 'x, y, z'
 '-x, -y, -z'

_cell_length_a                    12.1371(10)
_cell_length_b                    14.9716(12)
_cell_length_c                    19.096(2)
_cell_angle_alpha                 73.115(8)
_cell_angle_beta                  80.005(8)
_cell_angle_gamma                 73.965(8)
_cell_volume                      3174.7(5)
_cell_formula_units_Z             2
_cell_measurement_temperature     293(2)
_cell_measurement_reflns_used     25
_cell_measurement_theta_min       10.232
_cell_measurement_theta_max       14.084

_exptl_crystal_description        'regular rod'
_exptl_crystal_colour             'transparent colourless'
_exptl_crystal_size_max           0.42
_exptl_crystal_size_mid           0.26
_exptl_crystal_size_min           0.18
#_exptl_crystal_density_meas      'not measured'
_exptl_crystal_density_diffrn     1.862
_exptl_crystal_density_method     'not measured'
_exptl_crystal_F_000              1736
_exptl_absorpt_coefficient_mu     4.404
_exptl_absorpt_correction_type    experimental
#_exptl_absorpt_process_details   '(North, Phillips & Mathews, 1968)'
_exptl_absorpt_correction_T_min   0.884
_exptl_absorpt_correction_T_max   1.209

_exptl_special_details
;
 ?
;

_diffrn_ambient_temperature       293(2)
_diffrn_radiation_wavelength      0.71073
_diffrn_radiation_type            MoK\a
_diffrn_radiation_source          'fine-focus sealed tube'
_diffrn_radiation_monochromator   graphite
_diffrn_measurement_device        'Nonius CAD4'
_diffrn_measurement_method        \w/2\q-scan
_diffrn_special_details
;
\w/2\q-scan with variable scan width, variable scan speed and variable aperture.
Scan width (0.58 + 0.49tan\q)\%, range: 0.90\%-1.24\%,
aperture (1.70 + 0.43tan\q)mm., range: 1.72-1.92mm.
Maximum scan time: 30 sec/reflection.
;
_diffrn_detector_area_resol_mean  ?
_diffrn_standards_number          3
_diffrn_standards_interval_time   7200
_diffrn_standards_decay_%         12.562
_diffrn_reflns_number             15112
_diffrn_reflns_av_R_equivalents   0.0204
_diffrn_reflns_av_sigmaI/netI     0.0316
_diffrn_reflns_limit_h_min        -15
_diffrn_reflns_limit_h_max        15
_diffrn_reflns_limit_k_min        0
_diffrn_reflns_limit_k_max        19
_diffrn_reflns_limit_l_min        -23
_diffrn_reflns_limit_l_max        24
_diffrn_reflns_theta_min          2.70
_diffrn_reflns_theta_max          27.49
_reflns_number_total              14554
_reflns_number_gt                 11003
_reflns_number_observed           11003
_reflns_threshold_expression      >2sigma(I)
_reflns_observed_criterion        >2sigma(I)

_computing_data_collection
;
CAD4 EXPRESS (Enraf-Nonius, 1994)
;
#_computing_cell_refinement
#;
#CAD4 EXPRESS (Enraf-Nonius, 1994)
#;
_computing_data_reduction
;
local programs (Smits et al., 1988),
profile analysis (Lehman & Larsen, 1974, Grant & Gabe, 1978),
EMPABS (North et al., 1968)
;
_computing_structure_solution
;
DIRDIF (Beurskens et al., 1996),
PATTY (Beurskens et al., 1987)
;
_computing_structure_refinement   'SHELXL-97 (Sheldrick, 1997)'
_computing_molecular_graphics
;
PLUTON (Spek, 1993),
PLATON (Spek, 1990, 1995)
;
_computing_publication_material   ?

_refine_special_details
;
 Refinement of F^2^ against ALL reflections.  The weighted R-factor wR and
 goodness of fit S are based on F^2^, conventional R-factors R are based
 on F, with F set to zero for negative F^2^. The threshold expression of
 F^2^ > 2sigma(F^2^) is used only for calculating R-factors(gt) etc. and is
 not relevant to the choice of reflections for refinement.  R-factors based
 on F^2^ are statistically about twice as large as those based on F, and R-
 factors based on ALL data will be even larger.
;

_refine_ls_structure_factor_coef  Fsqd
_refine_ls_matrix_type            full
_refine_ls_weighting_scheme       calc
_refine_ls_weighting_details      
;
w=1/[\s^2^(Fo^2^)+(0.0451P)^2^+6.2107P] where P=(Fo^2^+2Fc^2^)/3
;
_atom_sites_solution_primary      direct
_atom_sites_solution_secondary    difmap
_atom_sites_solution_hydrogens    geom
_refine_ls_hydrogen_treatment     mixed
_refine_ls_extinction_method      none
_refine_ls_extinction_coef        ?
_refine_ls_number_reflns          14554
_refine_ls_number_parameters      857
_refine_ls_number_restraints      0
_refine_ls_R_factor_all           0.0587
_refine_ls_R_factor_gt            0.0379
_refine_ls_R_factor_obs           0.0379
_refine_ls_wR_factor_ref          0.0966
_refine_ls_wR_factor_all          0.0966
_refine_ls_wR_factor_gt           0.0882
_refine_ls_wR_factor_obs          0.0882
_refine_ls_goodness_of_fit_ref    1.065
_refine_ls_goodness_of_fit_all    1.065
_refine_ls_restrained_S_all       1.065
_refine_ls_shift/su_max           0.001
_refine_ls_shift/esd_max          0.001
_refine_ls_shift/su_mean          0.000
_refine_ls_shift/esd_mean         0.000

loop_
 _atom_site_label
 _atom_site_type_symbol
 _atom_site_fract_x
 _atom_site_fract_y
 _atom_site_fract_z
 _atom_site_U_iso_or_equiv
 _atom_site_adp_type
 _atom_site_occupancy
 _atom_site_calc_flag
 _atom_site_refinement_flags
 _atom_site_disorder_assembly
 _atom_site_disorder_group
Ir1 Ir 0.227005(17) 0.164071(14) 0.167344(10) 0.03666(6) Uani 1 d . . .
N1 N 0.3562(4) 0.0363(3) 0.1853(2) 0.0412(10) Uani 1 d . . .
N2 N 0.1382(4) 0.3085(3) 0.1307(2) 0.0428(10) Uani 1 d . . .
N3 N 0.1467(4) 0.1352(3) 0.0797(2) 0.0437(10) Uani 1 d . . .
N4 N 0.3429(4) 0.1994(3) 0.0792(2) 0.0433(10) Uani 1 d . . .
C1 C 0.3072(5) 0.2072(4) 0.2371(3) 0.0427(12) Uani 1 d . . .
H1A H 0.3546 0.1499 0.2665 0.051 Uiso 1 calc R . .
H1B H 0.3585 0.2458 0.2065 0.051 Uiso 1 calc R . .
N9 N 0.1222(4) 0.1214(3) 0.2573(2) 0.0438(10) Uani 1 d . . .
C2 C 0.0675(5) 0.0938(5) 0.3097(3) 0.0519(14) Uani 1 d . . .
C3 C -0.0062(7) 0.0584(7) 0.3739(4) 0.083(2) Uani 1 d . . .
H3A H -0.0596 0.1117 0.3889 0.124 Uiso 1 calc R . .
H3B H 0.0400 0.0204 0.4132 0.124 Uiso 1 calc R . .
H3C H -0.0479 0.0195 0.3624 0.124 Uiso 1 calc R . .
C11 C 0.4606(5) 0.1511(4) 0.1037(3) 0.0484(13) Uani 1 d . . .
H11A H 0.5165 0.1465 0.0611 0.058 Uiso 1 calc R . .
H11B H 0.4822 0.1889 0.1302 0.058 Uiso 1 calc R . .
C12 C 0.4607(5) 0.0533(4) 0.1520(3) 0.0479(13) Uani 1 d . . .
C13 C 0.5614(6) -0.0153(5) 0.1638(4) 0.0637(18) Uani 1 d . . .
H13 H 0.6308 -0.0015 0.1405 0.076 Uiso 1 calc R . .
C14 C 0.5603(6) -0.1039(5) 0.2097(4) 0.071(2) Uani 1 d . . .
H14 H 0.6286 -0.1498 0.2206 0.085 Uiso 1 calc R . .
C15 C 0.4560(6) -0.1234(5) 0.2393(4) 0.0634(17) Uani 1 d . . .
H15 H 0.4534 -0.1845 0.2688 0.076 Uiso 1 calc R . .
C16 C 0.3539(5) -0.0540(4) 0.2261(3) 0.0481(13) Uani 1 d . . .
C17 C 0.2420(6) -0.0811(4) 0.2550(4) 0.0584(16) Uani 1 d . . .
H17A H 0.2153 -0.0659 0.3015 0.088 Uiso 1 calc R . .
H17B H 0.2525 -0.1488 0.2613 0.088 Uiso 1 calc R . .
H17C H 0.1861 -0.0460 0.2207 0.088 Uiso 1 calc R . .
C21 C 0.3248(6) 0.3059(4) 0.0555(4) 0.0556(15) Uani 1 d . . .
H21A H 0.3775 0.3246 0.0782 0.067 Uiso 1 calc R . .
H21B H 0.3428 0.3256 0.0026 0.067 Uiso 1 calc R . .
C22 C 0.2055(5) 0.3567(4) 0.0753(3) 0.0476(13) Uani 1 d . . .
C23 C 0.1712(6) 0.4529(5) 0.0422(4) 0.0639(18) Uani 1 d . . .
H23 H 0.2182 0.4831 0.0041 0.077 Uiso 1 calc R . .
C24 C 0.0665(7) 0.5038(5) 0.0664(5) 0.074(2) Uani 1 d . . .
H24 H 0.0426 0.5696 0.0459 0.089 Uiso 1 calc R . .
C25 C -0.0029(6) 0.4576(5) 0.1208(4) 0.0677(19) Uani 1 d . . .
H25 H -0.0745 0.4921 0.1367 0.081 Uiso 1 calc R . .
C26 C 0.0327(5) 0.3596(5) 0.1526(4) 0.0528(14) Uani 1 d . . .
C27 C -0.0455(5) 0.3126(5) 0.2114(4) 0.0657(18) Uani 1 d . . .
H27A H -0.0533 0.2561 0.2004 0.099 Uiso 1 calc R . .
H27B H -0.1198 0.3563 0.2141 0.099 Uiso 1 calc R . .
H27C H -0.0141 0.2948 0.2577 0.099 Uiso 1 calc R . .
C31 C 0.3312(6) 0.1593(5) 0.0187(3) 0.0555(15) Uani 1 d . . .
H31A H 0.3601 0.1972 -0.0278 0.067 Uiso 1 calc R . .
H31B H 0.3786 0.0941 0.0261 0.067 Uiso 1 calc R . .
C32 C 0.2107(6) 0.1583(5) 0.0142(3) 0.0511(14) Uani 1 d . . .
C33 C 0.1713(7) 0.1707(6) -0.0515(4) 0.073(2) Uani 1 d . . .
H33 H 0.2159 0.1893 -0.0954 0.088 Uiso 1 calc R . .
C34 C 0.0651(8) 0.1554(8) -0.0521(4) 0.092(3) Uani 1 d . . .
H34 H 0.0362 0.1642 -0.0962 0.110 Uiso 1 calc R . .
C35 C 0.0030(7) 0.1270(6) 0.0136(4) 0.074(2) Uani 1 d . . .
H35 H -0.0672 0.1130 0.0141 0.088 Uiso 1 calc R . .
C36 C 0.0427(5) 0.1187(5) 0.0787(3) 0.0524(14) Uani 1 d . . .
C37 C -0.0278(6) 0.0878(5) 0.1491(4) 0.0635(18) Uani 1 d . . .
H37A H 0.0199 0.0374 0.1825 0.095 Uiso 1 calc R . .
H37B H -0.0888 0.0646 0.1398 0.095 Uiso 1 calc R . .
H37C H -0.0602 0.1414 0.1703 0.095 Uiso 1 calc R . .
Ir2 Ir 0.303357(17) 0.317634(14) 0.355206(10) 0.03636(6) Uani 1 d . . .
N5 N 0.1331(4) 0.3834(4) 0.3844(3) 0.0514(12) Uani 1 d . . .
N6 N 0.4586(4) 0.2178(3) 0.3481(2) 0.0466(11) Uani 1 d . . .
N7 N 0.3498(4) 0.3772(4) 0.4389(2) 0.0474(11) Uani 1 d . . .
N8 N 0.2795(4) 0.2129(4) 0.4480(3) 0.0501(12) Uani 1 d . . .
C4 C 0.2310(5) 0.2631(4) 0.2885(3) 0.0454(13) Uani 1 d . . .
H4A H 0.1836 0.2222 0.3210 0.054 Uiso 1 calc R . .
H4B H 0.1795 0.3172 0.2591 0.054 Uiso 1 calc R . .
N10 N 0.3402(4) 0.4093(3) 0.2588(2) 0.0429(10) Uani 1 d . . .
C5 C 0.3630(5) 0.4527(4) 0.2024(3) 0.0501(14) Uani 1 d . . .
C6 C 0.3907(7) 0.5123(5) 0.1295(4) 0.072(2) Uani 1 d . . .
H6A H 0.3305 0.5700 0.1191 0.107 Uiso 1 calc R . .
H6B H 0.3976 0.4774 0.0934 0.107 Uiso 1 calc R . .
H6C H 0.4623 0.5287 0.1282 0.107 Uiso 1 calc R . .
C51 C 0.1538(6) 0.2273(6) 0.4726(4) 0.0668(19) Uani 1 d . . .
H51A H 0.1226 0.1860 0.4547 0.080 Uiso 1 calc R . .
H51B H 0.1428 0.2089 0.5259 0.080 Uiso 1 calc R . .
C52 C 0.0913(6) 0.3261(6) 0.4462(4) 0.076(2) Uani 1 d . . .
C53A C -0.0020(19) 0.3772(18) 0.4925(10) 0.066(7) Uani 0.43(4) d P A 1
H53A H -0.0235 0.3451 0.5403 0.079 Uiso 0.43(4) calc PR A 1
C54A C -0.055(2) 0.469(2) 0.4656(13) 0.094(10) Uani 0.43(4) d P A 1
H54A H -0.1162 0.4976 0.4945 0.112 Uiso 0.43(4) calc PR A 1
C55A C -0.024(3) 0.5213(19) 0.3990(14) 0.081(8) Uani 0.43(4) d P A 1
H55A H -0.0575 0.5866 0.3829 0.098 Uiso 0.43(4) calc PR A 1
C53B C -0.022(2) 0.331(3) 0.472(2) 0.170(17) Uani 0.57(4) d P A 2
H53B H -0.0467 0.2862 0.5125 0.204 Uiso 0.57(4) calc PR A 2
C54B C -0.098(3) 0.413(4) 0.431(4) 0.35(5) Uani 0.57(4) d P A 2
H54B H -0.1775 0.4201 0.4419 0.420 Uiso 0.57(4) calc PR A 2
C55B C -0.056(2) 0.479(3) 0.378(3) 0.20(2) Uani 0.57(4) d P A 2
H55B H -0.1085 0.5334 0.3547 0.235 Uiso 0.57(4) calc PR A 2
C56 C 0.0662(7) 0.4699(7) 0.3529(5) 0.091(3) Uani 1 d . . .
C57 C 0.1006(8) 0.5311(6) 0.2821(5) 0.094(3) Uani 1 d . . .
H57A H 0.1602 0.5586 0.2877 0.140 Uiso 1 calc R . .
H57B H 0.0353 0.5816 0.2650 0.140 Uiso 1 calc R . .
H57C H 0.1289 0.4932 0.2469 0.140 Uiso 1 calc R . .
C61 C 0.3314(7) 0.1204(4) 0.4261(4) 0.0632(18) Uani 1 d . . .
H61A H 0.3430 0.0672 0.4696 0.076 Uiso 1 calc R . .
H61B H 0.2795 0.1094 0.3978 0.076 Uiso 1 calc R . .
C62 C 0.4434(6) 0.1258(5) 0.3812(3) 0.0578(16) Uani 1 d . . .
C63 C 0.5267(8) 0.0466(6) 0.3707(5) 0.081(2) Uani 1 d . . .
H63 H 0.5150 -0.0146 0.3931 0.097 Uiso 1 calc R . .
C64 C 0.6262(8) 0.0568(7) 0.3277(5) 0.093(3) Uani 1 d . . .
H64 H 0.6801 0.0037 0.3168 0.111 Uiso 1 calc R . .
C65 C 0.6455(7) 0.1468(7) 0.3007(5) 0.084(3) Uani 1 d . . .
H65 H 0.7151 0.1542 0.2732 0.101 Uiso 1 calc R . .
C66 C 0.5634(5) 0.2275(5) 0.3134(3) 0.0577(17) Uani 1 d . . .
C67 C 0.5905(6) 0.3233(6) 0.2934(4) 0.0684(19) Uani 1 d . . .
H67A H 0.6669 0.3159 0.3049 0.103 Uiso 1 calc R . .
H67B H 0.5362 0.3640 0.3207 0.103 Uiso 1 calc R . .
H67C H 0.5859 0.3517 0.2417 0.103 Uiso 1 calc R . .
C71 C 0.3463(6) 0.2156(5) 0.5063(3) 0.0572(16) Uani 1 d . . .
H71A H 0.3135 0.1844 0.5542 0.069 Uiso 1 calc R . .
H71B H 0.4254 0.1798 0.4988 0.069 Uiso 1 calc R . .
C72 C 0.3457(5) 0.3145(5) 0.5058(3) 0.0516(14) Uani 1 d . . .
C73 C 0.3501(6) 0.3384(6) 0.5703(4) 0.0638(18) Uani 1 d . . .
H73 H 0.3465 0.2935 0.6155 0.077 Uiso 1 calc R . .
C74 C 0.3597(7) 0.4279(7) 0.5665(4) 0.080(2) Uani 1 d . . .
H74 H 0.3623 0.4449 0.6091 0.096 Uiso 1 calc R . .
C75 C 0.3654(7) 0.4936(6) 0.4987(4) 0.073(2) Uani 1 d . . .
H75 H 0.3734 0.5547 0.4956 0.087 Uiso 1 calc R . .
C76 C 0.3591(6) 0.4676(5) 0.4346(4) 0.0583(16) Uani 1 d . . .
C77 C 0.3614(8) 0.5391(6) 0.3637(4) 0.084(3) Uani 1 d . . .
H77A H 0.4152 0.5108 0.3283 0.126 Uiso 1 calc R . .
H77B H 0.3846 0.5929 0.3691 0.126 Uiso 1 calc R . .
H77C H 0.2860 0.5606 0.3470 0.126 Uiso 1 calc R . .
P1 P 0.67833(16) 0.31306(14) 0.06496(10) 0.0578(4) Uani 1 d . . .
F1 F 0.5738(4) 0.3074(3) 0.1296(2) 0.0751(12) Uani 1 d . . .
F2 F 0.7618(5) 0.3101(5) 0.1202(3) 0.121(2) Uani 1 d . . .
F3 F 0.7777(4) 0.3221(3) -0.0021(3) 0.0851(13) Uani 1 d . . .
F4 F 0.5916(4) 0.3164(3) 0.0097(2) 0.0732(11) Uani 1 d . . .
F5 F 0.7123(4) 0.1999(3) 0.0808(3) 0.0926(14) Uani 1 d . . .
F6 F 0.6406(4) 0.4268(3) 0.0469(3) 0.0909(15) Uani 1 d . . .
P2 P 0.08518(19) 0.17413(15) 0.71347(11) 0.0701(5) Uani 1 d . . .
F7 F -0.0184(6) 0.1676(8) 0.7697(5) 0.203(4) Uani 1 d . . .
F8 F 0.1621(6) 0.0965(5) 0.7720(4) 0.147(3) Uani 1 d . . .
F9 F 0.1974(9) 0.1732(8) 0.6632(5) 0.236(6) Uani 1 d . . .
F10 F 0.0188(10) 0.2505(6) 0.6558(5) 0.230(5) Uani 1 d . . .
F11 F 0.0683(12) 0.0980(8) 0.6844(7) 0.264(6) Uani 1 d . . .
F12 F 0.1011(8) 0.2503(5) 0.7473(6) 0.191(4) Uani 1 d . . .
P3 P 0.34673(19) 0.39242(14) 0.80167(11) 0.0667(5) Uani 1 d . . .
F13 F 0.4554(8) 0.4264(9) 0.7803(6) 0.231(5) Uani 1 d . . .
F14 F 0.2804(9) 0.4810(5) 0.7496(4) 0.185(4) Uani 1 d . . .
F15 F 0.2368(9) 0.3611(9) 0.8253(8) 0.264(7) Uani 1 d . . .
F16 F 0.4102(7) 0.3000(5) 0.8542(3) 0.168(3) Uani 1 d . . .
F17 F 0.3127(9) 0.4434(7) 0.8625(4) 0.207(4) Uani 1 d . . .
F18 F 0.3786(10) 0.3420(5) 0.7401(4) 0.196(4) Uani 1 d . . .
P4 P 0.7152(2) 0.1642(2) 0.51666(13) 0.0903(7) Uani 1 d . . .
F19 F 0.6353(11) 0.2546(9) 0.5033(12) 0.372(12) Uani 1 d . . .
F20 F 0.6642(16) 0.1100(12) 0.5851(4) 0.349(11) Uani 1 d . . .
F21 F 0.7930(10) 0.0708(8) 0.5178(11) 0.363(11) Uani 1 d . . .
F22 F 0.7809(10) 0.2068(8) 0.4441(5) 0.223(5) Uani 1 d . . .
F23 F 0.6425(11) 0.1270(7) 0.4813(6) 0.237(5) Uani 1 d . . .
F24 F 0.7874(17) 0.1917(13) 0.5534(7) 0.386(13) Uani 1 d . . .
N91 N 0.3529(12) 0.9261(8) 0.0464(6) 0.147(4) Uani 1 d . . .
C92 C 0.3148(11) 0.8654(8) 0.0781(6) 0.105(3) Uani 1 d . . .
C93 C 0.2699(12) 0.7824(9) 0.1244(6) 0.134(4) Uani 1 d . . .
H93A H 0.3223 0.7442 0.1602 0.202 Uiso 1 calc R . .
H93B H 0.2623 0.7439 0.0939 0.202 Uiso 1 calc R . .
H93C H 0.1959 0.8052 0.1491 0.202 Uiso 1 calc R . .

loop_
 _atom_site_aniso_label
 _atom_site_aniso_U_11
 _atom_site_aniso_U_22
 _atom_site_aniso_U_33
 _atom_site_aniso_U_23
 _atom_site_aniso_U_13
 _atom_site_aniso_U_12
Ir1 0.03927(11) 0.03909(12) 0.03119(11) -0.00851(8) -0.00027(8) -0.01121(9)
N1 0.044(2) 0.040(2) 0.040(2) -0.0125(19) -0.0016(19) -0.010(2)
N2 0.042(2) 0.046(3) 0.041(2) -0.009(2) -0.008(2) -0.011(2)
N3 0.051(3) 0.044(3) 0.039(2) -0.013(2) -0.008(2) -0.012(2)
N4 0.048(3) 0.046(3) 0.036(2) -0.010(2) 0.001(2) -0.016(2)
C1 0.042(3) 0.046(3) 0.041(3) -0.015(2) -0.004(2) -0.007(2)
N9 0.045(3) 0.048(3) 0.037(2) -0.008(2) -0.002(2) -0.013(2)
C2 0.053(3) 0.055(4) 0.048(3) -0.014(3) 0.003(3) -0.017(3)
C3 0.081(5) 0.106(6) 0.056(4) -0.016(4) 0.023(4) -0.036(5)
C11 0.044(3) 0.053(3) 0.048(3) -0.018(3) 0.007(3) -0.012(3)
C12 0.047(3) 0.049(3) 0.050(3) -0.020(3) -0.003(3) -0.009(3)
C13 0.049(4) 0.061(4) 0.077(5) -0.027(4) 0.001(3) -0.003(3)
C14 0.059(4) 0.058(4) 0.088(5) -0.022(4) -0.014(4) 0.007(3)
C15 0.075(5) 0.046(4) 0.061(4) -0.011(3) -0.009(3) -0.002(3)
C16 0.060(4) 0.042(3) 0.043(3) -0.015(2) -0.002(3) -0.010(3)
C17 0.074(4) 0.044(3) 0.052(4) -0.005(3) -0.002(3) -0.016(3)
C21 0.061(4) 0.048(3) 0.054(4) -0.004(3) 0.004(3) -0.022(3)
C22 0.051(3) 0.049(3) 0.044(3) -0.006(3) -0.008(3) -0.018(3)
C23 0.069(4) 0.050(4) 0.066(4) 0.002(3) -0.020(4) -0.014(3)
C24 0.080(5) 0.043(4) 0.084(5) 0.005(4) -0.023(4) -0.004(4)
C25 0.061(4) 0.060(4) 0.075(5) -0.017(4) -0.019(4) 0.006(3)
C26 0.049(3) 0.055(4) 0.053(4) -0.015(3) -0.014(3) -0.004(3)
C27 0.041(3) 0.074(5) 0.072(5) -0.018(4) -0.003(3) -0.001(3)
C31 0.064(4) 0.070(4) 0.038(3) -0.020(3) 0.008(3) -0.026(3)
C32 0.062(4) 0.057(4) 0.037(3) -0.014(3) -0.001(3) -0.018(3)
C33 0.080(5) 0.099(6) 0.039(4) -0.013(4) -0.006(3) -0.025(4)
C34 0.086(6) 0.151(9) 0.054(5) -0.035(5) -0.019(4) -0.038(6)
C35 0.064(4) 0.104(6) 0.062(4) -0.023(4) -0.016(4) -0.027(4)
C36 0.059(4) 0.057(4) 0.049(3) -0.012(3) -0.014(3) -0.021(3)
C37 0.057(4) 0.080(5) 0.055(4) -0.005(3) -0.008(3) -0.031(4)
Ir2 0.04013(12) 0.03646(11) 0.02893(10) -0.00708(8) -0.00277(8) -0.00526(8)
N5 0.042(3) 0.058(3) 0.048(3) -0.020(2) 0.003(2) 0.000(2)
N6 0.051(3) 0.048(3) 0.036(2) -0.011(2) -0.012(2) 0.001(2)
N7 0.046(3) 0.060(3) 0.035(2) -0.014(2) 0.003(2) -0.015(2)
N8 0.059(3) 0.049(3) 0.037(2) -0.002(2) -0.002(2) -0.014(2)
C4 0.048(3) 0.044(3) 0.046(3) -0.016(3) -0.007(3) -0.008(2)
N10 0.050(3) 0.040(2) 0.036(2) -0.007(2) -0.004(2) -0.008(2)
C5 0.059(4) 0.043(3) 0.043(3) -0.003(3) -0.014(3) -0.006(3)
C6 0.094(5) 0.061(4) 0.048(4) 0.012(3) -0.011(4) -0.024(4)
C51 0.071(4) 0.089(5) 0.046(4) -0.013(3) 0.013(3) -0.043(4)
C52 0.046(4) 0.103(6) 0.063(4) -0.010(4) 0.008(3) -0.010(4)
C53A 0.064(12) 0.063(13) 0.050(10) -0.009(8) 0.020(8) -0.004(10)
C54A 0.069(15) 0.11(2) 0.065(14) -0.018(12) 0.020(10) 0.018(13)
C55A 0.078(17) 0.062(13) 0.080(15) -0.019(10) 0.011(11) 0.010(11)
C53B 0.076(14) 0.13(2) 0.25(3) -0.03(2) 0.077(18) -0.009(15)
C54B 0.071(18) 0.24(5) 0.49(8) 0.11(5) 0.14(3) 0.05(2)
C55B 0.055(14) 0.18(4) 0.26(4) -0.01(3) 0.01(2) 0.053(18)
C56 0.057(4) 0.095(6) 0.089(6) -0.018(5) 0.004(4) 0.019(4)
C57 0.101(7) 0.061(5) 0.087(6) -0.008(4) -0.007(5) 0.017(4)
C61 0.094(5) 0.036(3) 0.048(4) 0.004(3) -0.007(3) -0.011(3)
C62 0.071(4) 0.046(3) 0.045(3) -0.007(3) -0.022(3) 0.009(3)
C63 0.105(7) 0.055(4) 0.071(5) -0.022(4) -0.037(5) 0.022(4)
C64 0.088(6) 0.088(6) 0.078(6) -0.036(5) -0.027(5) 0.043(5)
C65 0.060(4) 0.110(7) 0.067(5) -0.040(5) -0.014(4) 0.027(4)
C66 0.049(3) 0.079(5) 0.038(3) -0.017(3) -0.013(3) 0.004(3)
C67 0.053(4) 0.101(6) 0.050(4) -0.016(4) -0.003(3) -0.023(4)
C71 0.069(4) 0.066(4) 0.029(3) -0.004(3) -0.007(3) -0.012(3)
C72 0.043(3) 0.073(4) 0.034(3) -0.013(3) -0.001(2) -0.010(3)
C73 0.062(4) 0.089(5) 0.040(3) -0.017(3) -0.007(3) -0.015(4)
C74 0.093(6) 0.112(7) 0.053(4) -0.041(4) -0.006(4) -0.034(5)
C75 0.084(5) 0.086(5) 0.066(5) -0.036(4) -0.001(4) -0.036(4)
C76 0.061(4) 0.073(4) 0.051(4) -0.027(3) 0.004(3) -0.027(3)
C77 0.132(8) 0.072(5) 0.063(5) -0.015(4) -0.005(5) -0.052(5)
P1 0.0614(10) 0.0638(11) 0.0516(9) -0.0094(8) -0.0074(8) -0.0252(8)
F1 0.091(3) 0.092(3) 0.051(2) -0.017(2) 0.006(2) -0.045(2)
F2 0.115(4) 0.176(6) 0.098(4) -0.024(4) -0.041(3) -0.069(4)
F3 0.061(2) 0.094(3) 0.098(3) -0.026(3) 0.017(2) -0.028(2)
F4 0.074(3) 0.100(3) 0.049(2) -0.009(2) -0.0110(19) -0.035(2)
F5 0.082(3) 0.065(3) 0.119(4) -0.004(3) -0.019(3) -0.014(2)
F6 0.098(3) 0.067(3) 0.106(4) -0.025(3) 0.028(3) -0.036(2)
P2 0.0792(13) 0.0713(12) 0.0571(11) -0.0133(9) 0.0111(10) -0.0280(10)
F7 0.079(4) 0.349(13) 0.158(7) -0.063(8) 0.032(4) -0.044(6)
F8 0.112(5) 0.142(6) 0.142(6) 0.016(5) -0.022(4) -0.004(4)
F9 0.202(9) 0.250(11) 0.164(8) -0.003(8) 0.118(7) -0.040(9)
F10 0.338(13) 0.147(7) 0.130(7) 0.012(5) -0.105(8) 0.060(8)
F11 0.371(16) 0.206(10) 0.312(14) -0.153(10) -0.140(13) -0.070(10)
F12 0.240(10) 0.111(5) 0.256(10) -0.089(6) -0.079(8) -0.019(6)
P3 0.0818(13) 0.0609(11) 0.0574(11) -0.0162(9) 0.0011(9) -0.0210(10)
F13 0.167(8) 0.301(13) 0.234(11) -0.025(10) 0.030(7) -0.147(9)
F14 0.264(10) 0.101(5) 0.155(7) -0.024(5) -0.092(7) 0.048(6)
F15 0.164(8) 0.217(11) 0.409(19) -0.026(11) 0.003(10) -0.118(8)
F16 0.208(8) 0.140(6) 0.080(4) 0.017(4) -0.011(4) 0.029(5)
F17 0.277(11) 0.219(9) 0.134(6) -0.122(7) -0.024(7) 0.010(8)
F18 0.338(12) 0.115(5) 0.113(5) -0.067(4) -0.073(7) 0.051(6)
P4 0.0826(15) 0.118(2) 0.0672(14) -0.0189(14) -0.0204(12) -0.0171(15)
F19 0.218(12) 0.182(11) 0.70(3) -0.232(17) 0.131(17) -0.012(9)
F20 0.59(2) 0.55(2) 0.079(5) -0.081(9) 0.076(9) -0.47(2)
F21 0.147(9) 0.165(10) 0.59(3) 0.071(14) 0.048(13) 0.025(7)
F22 0.242(11) 0.217(10) 0.155(8) -0.005(7) 0.056(7) -0.058(9)
F23 0.366(15) 0.196(9) 0.198(9) -0.017(7) -0.165(10) -0.097(10)
F24 0.56(3) 0.47(2) 0.237(12) 0.146(13) -0.249(15) -0.43(2)
N91 0.220(13) 0.100(7) 0.127(9) -0.062(7) 0.030(8) -0.043(8)
C92 0.144(10) 0.091(7) 0.088(7) -0.051(6) 0.008(7) -0.026(7)
C93 0.187(13) 0.131(10) 0.106(8) -0.065(8) 0.025(8) -0.059(9)

_geom_special_details
;
 All esds (except the esd in the dihedral angle between two l.s. planes)
 are estimated using the full covariance matrix.  The cell esds are taken
 into account individually in the estimation of esds in distances, angles
 and torsion angles; correlations between esds in cell parameters are only
 used when they are defined by crystal symmetry.  An approximate (isotropic)
 treatment of cell esds is used for estimating esds involving l.s. planes.
;

loop_
 _geom_bond_atom_site_label_1
 _geom_bond_atom_site_label_2
 _geom_bond_distance
 _geom_bond_site_symmetry_2
 _geom_bond_publ_flag
Ir1 N9 2.007(4) . Y
Ir1 N4 2.041(4) . Y
Ir1 N1 2.093(4) . Y
Ir1 N2 2.103(5) . Y
Ir1 C1 2.105(5) . Y
Ir1 N3 2.270(4) . Y
N1 C16 1.356(7) . Y
N1 C12 1.372(7) . Y
N2 C26 1.364(7) . Y
N2 C22 1.374(7) . Y
N3 C36 1.356(7) . Y
N3 C32 1.359(7) . Y
N4 C21 1.488(7) . Y
N4 C31 1.491(7) . Y
N4 C11 1.499(7) . Y
C1 C4 1.501(7) . Y
N9 C2 1.138(7) . Y
C2 C3 1.445(8) . Y
C11 C12 1.487(8) . Y
C12 C13 1.366(9) . Y
C13 C14 1.364(10) . Y
C14 C15 1.366(10) . Y
C15 C16 1.387(9) . Y
C16 C17 1.493(8) . Y
C21 C22 1.478(9) . Y
C22 C23 1.372(8) . Y
C23 C24 1.370(10) . Y
C24 C25 1.366(10) . Y
C25 C26 1.390(9) . Y
C26 C27 1.482(9) . Y
C31 C32 1.484(9) . Y
C32 C33 1.365(9) . Y
C33 C34 1.371(11) . Y
C34 C35 1.363(11) . Y
C35 C36 1.372(9) . Y
C36 C37 1.487(8) . Y
Ir2 N10 2.014(4) . Y
Ir2 N8 2.035(5) . Y
Ir2 N6 2.068(5) . Y
Ir2 N5 2.085(5) . Y
Ir2 C4 2.109(5) . Y
Ir2 N7 2.256(5) . Y
N5 C52 1.353(9) . Y
N5 C56 1.354(9) . Y
N6 C66 1.353(8) . Y
N6 C62 1.387(8) . Y
N7 C72 1.350(7) . Y
N7 C76 1.367(8) . Y
N8 C51 1.491(8) . Y
N8 C61 1.501(8) . Y
N8 C71 1.503(8) . Y
N10 C5 1.117(7) . Y
C5 C6 1.459(8) . Y
C51 C52 1.448(11) . Y
C52 C53B 1.37(2) . Y
C52 C53A 1.49(2) . Y
C53A C54A 1.33(3) . Y
C54A C55A 1.34(4) . Y
C55A C56 1.47(2) . Y
C53B C54B 1.43(5) . Y
C54B C55B 1.34(4) . Y
C55B C56 1.46(3) . Y
C56 C57 1.463(12) . Y
C61 C62 1.485(10) . Y
C62 C63 1.370(9) . Y
C63 C64 1.357(13) . Y
C64 C65 1.365(13) . Y
C65 C66 1.392(10) . Y
C66 C67 1.486(10) . Y
C71 C72 1.475(9) . Y
C72 C73 1.392(9) . Y
C73 C74 1.356(11) . Y
C74 C75 1.383(11) . Y
C75 C76 1.408(9) . Y
C76 C77 1.464(10) . Y
P1 F2 1.568(5) . Y
P1 F5 1.579(5) . Y
P1 F6 1.585(5) . Y
P1 F4 1.597(4) . Y
P1 F3 1.602(5) . Y
P1 F1 1.611(4) . Y
P2 F11 1.478(8) . Y
P2 F10 1.495(7) . Y
P2 F7 1.511(7) . Y
P2 F9 1.523(7) . Y
P2 F12 1.532(7) . Y
P2 F8 1.575(7) . Y
P3 F15 1.489(9) . Y
P3 F13 1.493(8) . Y
P3 F17 1.509(7) . Y
P3 F18 1.515(6) . Y
P3 F14 1.523(7) . Y
P3 F16 1.546(6) . Y
P4 F19 1.414(12) . Y
P4 F24 1.417(9) . Y
P4 F21 1.451(11) . Y
P4 F20 1.459(8) . Y
P4 F23 1.497(9) . Y
P4 F22 1.533(9) . Y
N91 C92 1.106(13) . Y
C92 C93 1.481(15) . Y

loop_
 _geom_angle_atom_site_label_1
 _geom_angle_atom_site_label_2
 _geom_angle_atom_site_label_3
 _geom_angle
 _geom_angle_site_symmetry_1
 _geom_angle_site_symmetry_3
 _geom_angle_publ_flag
N9 Ir1 N4 175.87(18) . . Y
N9 Ir1 N1 95.69(18) . . Y
N4 Ir1 N1 80.36(18) . . Y
N9 Ir1 N2 100.08(18) . . Y
N4 Ir1 N2 83.72(18) . . Y
N1 Ir1 N2 162.99(17) . . Y
N9 Ir1 C1 85.8(2) . . Y
N4 Ir1 C1 92.8(2) . . Y
N1 Ir1 C1 86.67(19) . . Y
N2 Ir1 C1 88.2(2) . . Y
N9 Ir1 N3 100.90(18) . . Y
N4 Ir1 N3 80.84(18) . . Y
N1 Ir1 N3 96.90(17) . . Y
N2 Ir1 N3 86.39(17) . . Y
C1 Ir1 N3 172.04(19) . . Y
C16 N1 C12 117.8(5) . . Y
C16 N1 Ir1 131.5(4) . . Y
C12 N1 Ir1 110.5(4) . . Y
C26 N2 C22 117.7(5) . . Y
C26 N2 Ir1 132.4(4) . . Y
C22 N2 Ir1 109.8(4) . . Y
C36 N3 C32 117.7(5) . . Y
C36 N3 Ir1 132.4(4) . . Y
C32 N3 Ir1 108.5(4) . . Y
C21 N4 C31 112.0(5) . . Y
C21 N4 C11 111.7(4) . . Y
C31 N4 C11 107.0(5) . . Y
C21 N4 Ir1 109.0(3) . . Y
C31 N4 Ir1 110.2(3) . . Y
C11 N4 Ir1 106.9(3) . . Y
C4 C1 Ir1 117.7(4) . . Y
C2 N9 Ir1 176.5(5) . . Y
N9 C2 C3 177.0(7) . . Y
C12 C11 N4 109.7(5) . . Y
C13 C12 N1 122.0(6) . . Y
C13 C12 C11 120.9(6) . . Y
N1 C12 C11 117.1(5) . . Y
C14 C13 C12 120.2(7) . . Y
C13 C14 C15 118.1(6) . . Y
C14 C15 C16 121.3(6) . . Y
N1 C16 C15 120.2(6) . . Y
N1 C16 C17 120.6(5) . . Y
C15 C16 C17 119.1(6) . . Y
C22 C21 N4 112.7(5) . . Y
C23 C22 N2 122.8(6) . . Y
C23 C22 C21 117.8(6) . . Y
N2 C22 C21 119.0(5) . . Y
C24 C23 C22 118.7(7) . . Y
C25 C24 C23 119.8(6) . . Y
C24 C25 C26 120.6(7) . . Y
N2 C26 C25 120.3(6) . . Y
N2 C26 C27 121.0(6) . . Y
C25 C26 C27 118.7(6) . . Y
C32 C31 N4 113.2(5) . . Y
N3 C32 C33 122.6(6) . . Y
N3 C32 C31 115.7(5) . . Y
C33 C32 C31 121.5(6) . . Y
C32 C33 C34 119.3(7) . . Y
C35 C34 C33 118.5(7) . . Y
C34 C35 C36 120.9(7) . . Y
N3 C36 C35 120.9(6) . . Y
N3 C36 C37 119.9(5) . . Y
C35 C36 C37 119.2(6) . . Y
N10 Ir2 N8 173.40(19) . . Y
N10 Ir2 N6 94.08(19) . . Y
N8 Ir2 N6 79.9(2) . . Y
N10 Ir2 N5 101.83(19) . . Y
N8 Ir2 N5 83.9(2) . . Y
N6 Ir2 N5 163.1(2) . . Y
N10 Ir2 C4 83.1(2) . . Y
N8 Ir2 C4 94.3(2) . . Y
N6 Ir2 C4 91.7(2) . . Y
N5 Ir2 C4 84.7(2) . . Y
N10 Ir2 N7 103.20(18) . . Y
N8 Ir2 N7 80.24(19) . . Y
N6 Ir2 N7 95.88(18) . . Y
N5 Ir2 N7 85.96(19) . . Y
C4 Ir2 N7 169.66(19) . . Y
C52 N5 C56 120.1(6) . . Y
C52 N5 Ir2 109.5(4) . . Y
C56 N5 Ir2 130.5(5) . . Y
C66 N6 C62 118.4(5) . . Y
C66 N6 Ir2 131.5(4) . . Y
C62 N6 Ir2 109.9(4) . . Y
C72 N7 C76 118.5(5) . . Y
C72 N7 Ir2 109.6(4) . . Y
C76 N7 Ir2 130.7(4) . . Y
C51 N8 C61 113.4(5) . . Y
C51 N8 C71 111.7(5) . . Y
C61 N8 C71 108.2(5) . . Y
C51 N8 Ir2 108.9(4) . . Y
C61 N8 Ir2 104.7(3) . . Y
C71 N8 Ir2 109.6(4) . . Y
C1 C4 Ir2 120.5(4) . . Y
C5 N10 Ir2 173.1(5) . . Y
N10 C5 C6 178.0(7) . . Y
C52 C51 N8 112.2(5) . . Y
N5 C52 C53B 126.9(15) . . Y
N5 C52 C51 120.1(6) . . Y
C53B C52 C51 107.2(15) . . Y
N5 C52 C53A 115.1(11) . . Y
C53B C52 C53A 39.9(18) . . Y
C51 C52 C53A 123.0(10) . . Y
C54A C53A C52 120.2(17) . . Y
C53A C54A C55A 123(2) . . Y
C54A C55A C56 116(2) . . Y
C52 C53B C54B 113(2) . . Y
C55B C54B C53B 120(2) . . Y
C54B C55B C56 124(2) . . Y
N5 C56 C57 123.2(7) . . Y
N5 C56 C55B 113.1(16) . . Y
C57 C56 C55B 119.2(16) . . Y
N5 C56 C55A 119.5(13) . . Y
C57 C56 C55A 114.1(13) . . Y
C55B C56 C55A 41(2) . . Y
C62 C61 N8 109.4(5) . . Y
C63 C62 N6 120.9(7) . . Y
C63 C62 C61 123.4(7) . . Y
N6 C62 C61 115.6(5) . . Y
C64 C63 C62 120.3(8) . . Y
C63 C64 C65 118.6(7) . . Y
C64 C65 C66 121.4(8) . . Y
N6 C66 C65 119.3(7) . . Y
N6 C66 C67 119.3(6) . . Y
C65 C66 C67 121.3(7) . . Y
C72 C71 N8 112.6(5) . . Y
N7 C72 C73 122.6(6) . . Y
N7 C72 C71 116.0(5) . . Y
C73 C72 C71 121.2(6) . . Y
C74 C73 C72 119.3(7) . . Y
C73 C74 C75 119.6(7) . . Y
C74 C75 C76 119.8(7) . . Y
N7 C76 C75 120.3(6) . . Y
N7 C76 C77 120.7(6) . . Y
C75 C76 C77 119.0(7) . . Y
F2 P1 F5 91.4(3) . . Y
F2 P1 F6 90.9(3) . . Y
F5 P1 F6 177.7(3) . . Y
F2 P1 F4 179.0(3) . . Y
F5 P1 F4 88.8(3) . . Y
F6 P1 F4 88.9(3) . . Y
F2 P1 F3 91.4(3) . . Y
F5 P1 F3 91.2(3) . . Y
F6 P1 F3 88.8(3) . . Y
F4 P1 F3 89.6(2) . . Y
F2 P1 F1 91.0(3) . . Y
F5 P1 F1 90.3(3) . . Y
F6 P1 F1 89.5(2) . . Y
F4 P1 F1 88.1(2) . . Y
F3 P1 F1 177.1(3) . . Y
F11 P2 F10 91.0(6) . . Y
F11 P2 F7 92.1(7) . . Y
F10 P2 F7 94.5(6) . . Y
F11 P2 F9 88.4(7) . . Y
F10 P2 F9 91.6(6) . . Y
F7 P2 F9 173.9(6) . . Y
F11 P2 F12 177.2(7) . . Y
F10 P2 F12 90.9(5) . . Y
F7 P2 F12 85.8(6) . . Y
F9 P2 F12 93.6(6) . . Y
F11 P2 F8 90.7(6) . . Y
F10 P2 F8 176.3(6) . . Y
F7 P2 F8 88.7(5) . . Y
F9 P2 F8 85.2(5) . . Y
F12 P2 F8 87.5(5) . . Y
F15 P3 F13 177.5(8) . . Y
F15 P3 F17 86.6(7) . . Y
F13 P3 F17 90.9(7) . . Y
F15 P3 F18 92.6(7) . . Y
F13 P3 F18 89.9(7) . . Y
F17 P3 F18 178.9(6) . . Y
F15 P3 F14 87.6(6) . . Y
F13 P3 F14 92.2(6) . . Y
F17 P3 F14 89.9(5) . . Y
F18 P3 F14 89.3(4) . . Y
F15 P3 F16 90.2(6) . . Y
F13 P3 F16 90.1(6) . . Y
F17 P3 F16 91.2(5) . . Y
F18 P3 F16 89.6(4) . . Y
F14 P3 F16 177.4(6) . . Y
F19 P4 F24 94.7(11) . . Y
F19 P4 F21 169.9(13) . . Y
F24 P4 F21 93.6(11) . . Y
F19 P4 F20 103.0(10) . . Y
F24 P4 F20 93.2(6) . . Y
F21 P4 F20 82.4(9) . . Y
F19 P4 F23 89.4(9) . . Y
F24 P4 F23 175.4(8) . . Y
F21 P4 F23 82.5(9) . . Y
F20 P4 F23 83.9(6) . . Y
F19 P4 F22 85.3(8) . . Y
F24 P4 F22 87.7(7) . . Y
F21 P4 F22 89.2(7) . . Y
F20 P4 F22 171.6(9) . . Y
F23 P4 F22 94.6(6) . . Y
N91 C92 C93 176.0(15) . . Y

_diffrn_reflns_theta_full              27.49
_refine_diff_density_max    1.162
_refine_diff_density_min   -0.809
_refine_diff_density_rms    0.112
_publ_section_experimental
;
Crystal colour: transparent colourless, crystal shape: regular rod.
Profile analysis combining the methods of Lehman & Larsen (1974) 
and Grant & Gabe (1978).
Empirical absorption correction using EMPABS 
(North, Phillips & Mathews, 1968).

Data collection parameters:
\w/2\q-scan with variable scan width, variable scan speed and variable aperture.
Scan width (0.58 + 0.49tan\q)\%, range: 0.90\%-1.24\%,                          
aperture (1.70 + 0.43tan\q)mm., range: 1.72-1.92mm.                             
Maximum scan time: 30 sec/reflection.                                           

Least-squares refinement using calculated weights:

w=1/[\s^2^(Fo^2^)+(0.0451P)^2^+6.2107P] where P=(Fo^2^+2Fc^2^)/3                

A few atoms, C53, C54 and C55, showed large disorder and were split
into two partially occupied parts. Even then one of the two parts still
shows large disorder, but further splitting doesn't improve the
physical model. The same holds for some of the fluorine atoms for which
no other models could be found that would result in a stable refinement.
;

#===END
